# Supplementary material for: Gradual reduction in exercise capacity in chronic kidney disease is associated with systemic oxygen delivery factors
Source: PLoS One. 2018 Dec 19;13(12):e0209325. doi: 10.1371/journal.pone.0209325 (PMC6300328; doi:10.1371/journal.pone.0209325)
Supplement: S1 File — (XLSX) [file pone.0209325.s001.xlsx]

## Sheet: All groups
			cm	m2	kg																												1=yes, 0=no							Echo
grp	age	gender	height	height2	weight	BMI	PhysAct	Handgrip	GFR	Hb	Hrrest	HRmax	Hrpred	%maxpuls	HRmax-min	HRreserve	MaxW	StartW	Incr per min	DeltaW	JustWmale15	JustWfemale10	JustW1510	JustW1510all	Wpred	W%pred	Wjust%Pred	Duration	Syst	Diast	Upright BP	MaxBT	BB	other BP med	Statin	Borg 0-10	Limiting factor	s_krea	crp	LVDM	E/é mean	AVR	LVMASC	LVMBSC	EF	BSA	LVED ml Simpson	LVS ml Simp	SV Simpson
1	57	0	165	2.7225	80	29.3848	3	21	14	119	54	101	163	0.619632	47	62	100	30	10	70	0	100		100	139.752	0.715553	0.715553	8	140	70	130	200	1	0	1	10	allmän trötthet	461		5.03	3.48571	1.92	241.5	128.2	59	1.88	118	48	70
1	19	0	151	2.2801	56	24.5603	3	18	11	112	79	177	201	0.880597	98	24	100	40	20	60	0	0	89	89	150.45	0.664673	0.591559	4	125	80	130	170	0	1	0	10	ben	484	5.8	4.65	6.45151	2.24	137.5	88.2	59.9	1.56	81	31	50
1	62	0	161	2.5921	49	18.9036	1	20	10	112	60	151	158	0.955696	91	7	105	30	15	75	0	0	99.75	100	126.664	0.828967	0.789492	6	150	90		190	0	1	0	10		500	0.25	4.265	7.54634	2.44	208.6	137.7	77.2	1.51
1	40	0	167	2.7889	71	25.4581	2	32	17	122	80	178	180	0.988889	98	2	220	40	15	180	0	0	204.6	205	167.82	1.31093	1.22154	13	110	70	110	180	0	1	0	8	allm trötth	492	0.39	4.55	7.21738	2.28	163.7	91.1	59.7	1.8
1	56	0	167	2.7889	77	27.6095	2	25	8	118	47	92	164	0.560976	45	72	115	40	15	75	0	0	106.95	107	144.16	0.797725	0.742231	6	145	80	150	200	1	0	1	10	ben	581	2	4.935	10.8308	2.73	240.2	130.6	66.7	1.84	120	49	71
1	61	1	189	3.5721	115	32.1939	3		22	122	58	87	159	0.54717	29	72	120	30	15	90	120	0		120	235.35	0.509879	0.509879	7	150	75	90	185	1	0	1	7	ben	189	6.3	4.235		1.02	372.1	155.9	65.8	2.39	92	28	64
1	49	1	177	3.1329	108	34.4729	3	48	20	118	63	88	171	0.51462	25	83	120	30	10	90	0	0	128.4	128	238.161	0.50386	0.537451	10	145	80	105	180	1	1	1	10	ben	280	8.6	5.415	10.3095	2.95	373.6	168.7	56	2.21	138	57	81
1	55	0	165	2.7225	68.1	25.0138	3	23.5	15	131	82	145	165	0.878788	63	20	90	40	10	50	0	90		90	142.816	0.630182	0.630182	6	120	80	120	180	0	1	1	8	ben	295	1.5	4.31	6.3892	1.66	150.7	85.6	57.3	1.76	77	26	51
1	57	1	187	3.4969	114	32.6003	3	31	20	129	54	70	163	0.429448	16	93	95	50	15	45	95	0		95	242.009	0.392547	0.392547	4	160	90	120	130	1	0	1	9	ben	285.4	1.7	6.115			307.7	129	47.5	2.39
1	32	1	191	3.6481	88	24.1221	4	63	11	98	82	179	188	0.952128	97	9	220	40	20	180	0	0	209	209	308.18	0.71387	0.678176	10	130	80	105	160	1	1	0	10	allm trötth	569.5	0.22	4.84	4.4921	2.46	234.8	108.2	65.5	2.17	135	55	80
1	60	1	174	3.0276	85	28.075	1	40	10	153	76	167	160	1.04375	91	-7	190	50	20	140	0	0	180.5	181	204.878	0.927382	0.883453	8	145	90	145	190	1	1	1	10	ben	623.8	1.5	4.21	6.41295	1.5	170.6	84.5	53.6	2.02	84	30	54
1	24	1	168	2.8224	55	19.487	3	62	9	127	90	188	196	0.959184	98	8	170	50	20	120	0	0	161.5	162	244.293	0.695886	0.663138	7	140	70	140	200	0	1	1	8.5	andn	822.8	0.19	4.89	4.931	2.07	229	140.8	56.4	1.63	94	39	55
1	60	0	163	2.6569	59	22.2063	3	17	22	135	70	84	160	0.525	14	76	70	40	10	30	0	70		70	132.38	0.52878	0.52878	4	160	65	120	135	1	1	0	7	ben	167.1	7.5	4.88	6.74742	2.15	180.4	109.7	64.9	1.64	97	41	56
1	50	1	180	3.24	114	35.1852	3	50	19	122	84	155	170	0.911765	71	15	240	40	20	200	0	0	228	228	243.283	0.986506	0.937181	11	155	90		250	0	1	1	10	ben	376	2.3	5.96	6.85353		335.4	143.9	50.4	2.33
1	58	1	172	2.9584	72	24.3375	3	42	19	126	58	110	162	0.679012	52	52	140	50	15	90	140	0		140	205.175	0.682345	0.682345	7	170	90	150	210	1	0	1	5	andn	246	1	4.5	8.68717	1.75	285.9	154.8	66	1.85	110	29	81
1	60	1	182	3.3124	97	29.2839	1	50	12	122	59	122	160	0.7625	63	38	200	40	15	160	200	0		200	222.641	0.898306	0.898306	12	220	105	210	260	1	1	1	10	ben + bltr	561.3	0.56	5.095	7.68201	2.52	337.3	154.4	57.3	2.18	130	45	85
1	59	1	175	3.0625	85	27.7551	3	39	15	126	100	166	161	1.03106	66	-5	185	50	15	135	185	0		185	209.552	0.882836	0.882836	10	115	80	105	180	0	1	0	8.5	ben	332	0.94	4.455	6.23735	1.68	169.3	84.3	57.8	2.01	102	41	61
1	53	0	177	3.1329	83	26.493	3		20	108	78	129	167	0.772455	51	38	100	30	10	70	0	100		100	163.658	0.611032	0.611032	8	140	75	140	190	0	1	1	10	allm trötth	338.4	2.3	4.42	5.46248	2.42	169.5	85.2	68.6	1.99	89	34	55
1	62	1	188	3.5344	87.9	24.8699	3	46	12	137	111	149	158	0.943038	38	9	140	50	15	90	140	0		140	230.337	0.607804	0.607804	7	130	80	100	160	0	1	1	7	allm trötth	579.8	4	3.97	5.14467	2.41	206.7	96.3	53.2	2.15	87	25	62
1	59	1	176.5	3.11522	106	34.0264	3	37	17	108	68	135	161	0.838509	67	26	175	40	15	135	175	0		175	212.922	0.821897	0.821897	10	150	80		220	0	1	1	10	ben	262.8	1.2	4.555	8.2218	2.64	305.6	137.5	53.8	2.22	107	40	67
1	61	0	165	2.7225	50	18.3655	3	29	15	125	80	145	159	0.91195	65	14	80	40	10	40	0	80		80	133.582	0.598881	0.598881	5	165	80	160	205	0	0	1	9	ben	348.9	1.6	4.1	9.08612	2.36	159.4	103.8	60	1.53	85	29	56
1	50	1	180	3.24	72	22.2222	2	63	17	118	70	174	170	1.02353	104	-4	230	70	20	160	0	0	218.5	219	243.283	0.945401	0.900187	9	140	80	140	180	0	1	1	10	allm trötth	436	0.3	4.05	5.71568	2.19	181.2	94.9	79.7	1.91	99	29	70
1	50	1	178	3.1684	80.5	25.4071	3	33	19	133	81	170	170	1	89	0	220	40	20	180	0	0	209	209	238.332	0.923084	0.87693	10	130	80	120	210	0	1	1	10	ben	302	2.8	5.055	3.43468	2	209.6	105.3	57.7	1.99	126	51	75
1	36	1	192	3.6864	94	25.4991	3	59.5	18	128	58	142	184	0.771739	84	42	260	60	20	200	0	0	247	247	305.228	0.851821	0.80923	11	120	75	85	180	1	1	1	10	allm trötth	400	0.98	5.635	5.90613	3.06	246.3	110.9	69.7	2.22	138	46	92
1	57	0	161	2.5921	60	23.1473	3	22	12	120	64	150	163	0.920245	86	13	105	30	15	75	0	0	97.65	98	134.067	0.783189	0.730976	6	140	85	130	160	0	1	1	10	ben	388	0.62	3.73	5.67813	2.22	89.9	55.2	54	1.64
1	40	1	179	3.2041	72	22.4712	3	43	15	107	89	183	180	1.01667	94	-3	200	60	20	140	0	0	190	190	262.407	0.762176	0.724067	8	130	80	135	170	0	1	0	9	ben	866	5	4.205	7.18386	2.87	150.4	77.1	75.3	1.95	97	29	68
1	53	1	180	3.24	75	23.1481	3	60	16	118	66	178	167	1.06587	112	-11	220	60	20	160	0	0	209	209	235.976	0.932299	0.885684	9	130	80	140	210	0	1	1	9.5	ben	358	1.5	5.49	6.45197	2.63	221.3	113.9	69.7	1.94	132	51	81
1	42	1	178	3.1684	89	28.0899	1	40	13	114	69	167	178	0.938202	98	11	260	40	20	220	0	0	247	247	255.852	1.01621	0.9654	12	140	85	130	220	0	1	1	10	allm trötth	555	1.9	5.03	10.6317	2.51	227	109.5	61.7	2.07	118	45	73
1	41	1	184	3.3856	76	22.448	2	53	17	117	83	175	179	0.977654	92	4	220	40	20	180	0	0	209	209	273.883	0.803263	0.7631	10	130	80	125	220	0	1	1	8	ben	425	2.2	4.97	6.09195	2.18	225.6	113	66.5	2	108	38	70
1	61	1	179	3.2041	73	22.7833	2	42	14	121	62	116	159	0.72956	54	43	170	40	15	130	170	0		170	213.41	0.796589	0.796589	10	150	85	130	210	1	1	1	10	allt	631	1.4	4.325	7.44186	2.06	231.9	120.6	76.8	1.92	126	49	77
1	61	1	180	3.24	86	26.5432	3	45	20	138	42	111	159	0.698113	69	48	185	65	15	120	185	0		185	215.604	0.858055	0.858055	9	205	100	175	210	1	1	1	8	allm trötth	335	11.1	4.11	6.12278	1.94	225.4	110	69.7	2.05	150	60	90
1	59	0	161	2.5921	68	26.2336	3	23	12	126	65	129	161	0.801242	64	32	110	40	10	70	0	110		110	131.113	0.838971	0.838971	8	145	75	135	195	0	1	0	9.5	allm trötth	410	2.1	4.105	7.12663	2.42	156.5	89.6	77	1.75	78	18	60
1	30	0	154	2.3716	49	20.6612	4	26	15	135	91	150	190	0.789474	59	40	60	30	10	30	0	60		60	155.687	0.385388	0.385388	4	125	80	130	155	0	0	1	7	ben	427	3.2	3.625	5.42366	1.82	65.9	48.6	69.9	1.36	55	15	40
1	57	0	163	2.6569	68	25.5937	2	25	20	117	74	153	163	0.93865	79	10	105	30	15	75	0	0	97.65	98	136.91	0.766929	0.7158	6	135	75	130	190	1	1	0	7	andn	234	1.6	4.4	7.15994	2.08	118.1	67.7	72.9	1.74
1	54	1	178	3.1684	73	23.04	2	46	14	104	70	113	166	0.680723	43	53	180	60	20	120	0	0	171	171	228.739	0.786924	0.747578	7	125	80	130	160	1	1	1	8	ben	604	1.1	3.955	6.12236	2.2	202.2	105.1	66.9	1.92	130	41	89
1	57	0	164	2.6896	63	23.4236	3	24	19	110	74	141	163	0.865031	67	22	135	30	15	105	0	0	125.55	126	138.331	0.975921	0.91086	8	140	85	125	165	0	1	0	10	ben	357	5	4.935	4.97628	2.35	203.9	119.6	67.5	1.7	113	36	77
1	34	1	176	3.0976	63	20.3383	2	61	19	123	69	172	186	0.924731	103	14	280	60	20	220	0	0	266	266	263.661	1.06197	1.00887	12	120	60	120	200	0	1	1	9	ben	360	0.2	5.28	4.59378	2.21	186.9	106	55.3	1.76	135	59	76
1	57	0	173	2.9929	68.5	22.8875	3	27	11	157	79	148	163	0.907975	69	15	110	40	10	70	0	110		110	151.122	0.72789	0.72789	8	135	95	120	190	0	1	0	10	allm trötth	360	1.4	5.06	3.29925	2.43	245.7	135.7	44.2	1.81	135	70	65
1	37	0	178	3.1684	82	25.8806	4	36	22	125	55	165	183	0.901639	110	18	160	40	15	120	0	0	148.8	149	190.468	0.840036	0.782284	9	110	60	90	145	0	1	0	7.5	ben	398	0.85	4.265	5.00491	1.8	149.3	74.2	47.7	2.01	74	26	48
1	33	1	176	3.0976	90	29.0548	3	40	19	99	83	166	187	0.887701	83	21	170	50	20	120	159	0		159	264.837	0.641904	0.600369	7	115	75	130	220	0	1	1	7	ben	329	5.6	4.56	6.29061	2.04	205.3	99.4	70.5	2.06
1	50	1	170	2.89	68	23.5294	3	40	14	98	78	173	170	1.01765	95	-3	150	50	20	100	0	0	142.5	143	218.526	0.686417	0.654384	6	120	75	110	170	0	1	1	9.5	ben	514	2.3	4.84	5.97095	2.38	200.9	109	65	1.84
1	62	0	177	3.1329	90	28.7274	3	29	12	125	64	116	158	0.734177	52	42	110	40	10	70	0	110		110	148.147	0.742504	0.742504	8	185	100	180	185	1	1	1	7.5	ben	486	1.4	5.235	4.49827	2.75	254.1	122.5	35	2.07	104	38	66
1	48	0	157	2.4649	51	20.6905	3	15	12	147	60	113	172	0.656977	53	59	70	40	10	30	0	70		70	140.846	0.496997	0.496997	4	110	75	110	165	0	1	0	8.5	ben	466	1.1	4.09	4.6879	2.7	107.7	71.5	75.4	1.51	62	22	40
1	36	1	176	3.0976	79	25.5036	2	42	16	109	58	150	184	0.815217	92	34	210	70	20	140	0	0	199.5	200	260.94	0.804783	0.76646	7	130	80	120	190	1	1	0	10	ben	414	0.78	4.965	4.89452	2.11	244.8	125.3	58	1.95	141	65	76
1	46	0	161	2.5921	78	30.0914	4	17	19	133	70	141	174	0.810345	71	33	100	40	10	60	0	100		100	149.867	0.667258	0.667258	7	120	80	120	130	0	1	1	7	ben	298	0.75	3.795	8.04514	2.17	113	62	49.9	1.82	78	28	50
1	31	1	186	3.4596	71	20.5226	4	48	13	126	100	169	189	0.89418	69	20	140	50	15	90	140	0		140	295.055	0.474489	0.474489	7	110	75	100	160	0	1	0	9	ben	425	9.7	4.6	5.00684	1.91	151.8	78	57.8	1.95	83	30	53
1	33	1	180	3.24	71	21.9136	3	38	14	118	78	176	187	0.941176	98	11	180	60	20	120	0	0	171	171	276.074	0.651998	0.619398	7	115	80	120	185	0	0	0	8	ben	406	1.8	4.785	5.95868	2.68	201.1	107.9	69.4	1.86	89	31	58
2	58	0	163	2.6569	67	25.2174	4	20	51	106	72	120	162	0.740741	48	42	90	40	10	50	0	90		90	135.403	0.664683	0.664683	6	135	70	125	190	0	1	1	5	allm trötth	126		4.29	6.66255	2.13	136.8	79.9	62.2	1.71	71	22	49
2	31	1	175	3.0625	75	24.4898	1	50	51	142	54	195	189	1.03175	141	-6	320	80	20	240	0	0	304	304	263.927	1.21245	1.15183	13	140	75	140	230	0	1	1	8.5	allm trötth	137	1.5	5.165	6.40727	2.77	226.2	117.7	65.8	1.92	144	35	109
2	59	0	171	2.9241	61.5	21.0321	3	35	68	157	61	135	161	0.838509	74	26	120	40	10	80	0	120		120	145.012	0.827518	0.827518	8	140	80		180	0	1	1	10	allm trötth	96	5.2	4.015	7.43183	2.15	137.6	80.8	58.4	1.7	63	20	43
2	47	1	174	3.0276	113	37.3233	3	35	57	134	68	98	173	0.566474	30	75	135	30	15	105	135	0		135	235.03	0.574396	0.574396	8	165	95		145	1	1	1	7	allm trötth	121	2.4	4.96	9.80152	2.16	243.6	108.4	61.3	2.25	119	36	83
2	24	0	164	2.6896	76	28.257	2	21	64	113	71	173	196	0.882653	102	23	120	50	10	70	0	120		120	176.164	0.681183	0.681183	8	110	75		155	0	1	0	9	ben	89	20.3	4.15	6.21997	2.34	123.3	67.5	68.6	1.83	80	29	51
2	60	1	175	3.0625	73	23.8367	3	33	68	129	62	166	160	1.0375	104	-6	210	50	20	160	0	0	199.5	200	207.098	1.01401	0.965725	9	130	75	125	220	0	1	0	10	allm trötth	108	1.6	4.59	5.04465	2.39	168.6	89.6	66.4	1.88	143	54	89
2	55	0	165	2.7225	83	30.4867	4	18	62	127	74	147	165	0.890909	73	18	130	40	15	90	0	0	120.9	121	142.816	0.910263	0.847245	7	120	80	120	185	0	1	0	10	allm trötth	100	11.1	4.61	8.91424	2.48	215.7	113.3	70.3	1.9	94	25	69
2	49	1	175	3.0625	79	25.7959	2	51	62	141	78	175	171	1.02339	97	-4	175	50	20	125	0	0	166.25	166	233.161	0.750553	0.711953	9	130	70	140	190	0	0	1	9	allm trötth	113	3.4	4.415	4.88571	1.74	175.8	89	58.5	1.98	75	21	54
2	56	1	175	3.0625	97	31.6735	4	48	62	145	81	162	164	0.987805	81	2	200	50	15	150	200	0		200	216.835	0.922361	0.922361	11	150	80	135	240	1	1	0	9	ben	130	2.6	5.515	5.63494	3.11	252.4	117.9	62.8	2.14	104	33	71
2	58	1	175	3.0625	97	31.6735	3	50	59	131	81	128	162	0.790123	47	34	155	50	15	105	155	0		155	211.993	0.731155	0.731155	8	160	60		190	0	1	0	7	Ben	140	1.1	6.085	7.23443	2.14	348.9	162.9	58.6	2.14	230	97	133
2	51	0	158	2.4964	57	22.8329	4	16	51	143	89	118	169	0.698225	29	51	80	30	10	50	0	80		80	138.274	0.578562	0.578562	5	110	60	120	160	1	1	1	10	ben	85	7.9							1.7	46	10	36
2	37	0	169	2.8561	52	18.2066	2	32	66	136	93	177	183	0.967213	84	6	145	40	15	105	0	0	134.85	135	175.071	0.828236	0.771116	8	105	65	115	180	0	0	0	10	ben	96	0.8	4.5	3.73866	1.77	151.5	93.2	55.6	1.63	89	41	48
2	33	1	182	3.3124	82	24.7555	2	53	65	136	60	182	187	0.973262	122	5	340	60	20	280	0	0	323	323	281.693	1.20699	1.14664	14	130	85	135	250	0	0	0	8	ben	127	0.98	5.34	5.5571	2.63	323.5	157.5	64.6	2.05	191	72	119
2	50	1	173	2.9929	68	22.7204	3	45	64	152	69	179	170	1.05294	110	-9	220	60	20	160	0	0	209	209	225.953	0.973653	0.924971	9	130	65	105	170	0	0	0	7.5	allm trötth	132	0.65	4.52	5.37152	2.26	154.8	85.5	55.1	1.81	92	39	53
2	34	0	172	2.9584	64	21.6333	1	32	60	108	66	167	186	0.897849	101	19	175	40	15	135	0	0	162.75	163	183.825	0.951993	0.886714	10	135	85	125	200	0	1	0	8	ben	105	0.81	5.065	4.91392	2.21	226.8	130	51.8	1.75	142	50	92
2	59	1	183	3.3489	73	21.7982	1	44	63	135	63	128	161	0.795031	65	33	230	50	15	180	230	0		230	227.526	1.01087	1.01087	13	155	80	155	265	0	1	0	9	blodtryck	127		5.765	6.80625	3.02	361	185.7	55	1.94	170	75	95
2	48	0	156	2.4336	63	25.8876	2	28	60	129	78	165	172	0.959302	87	7	145	40	15	105	0	0	134.85	135	139.287	1.04102	0.969223	8	110	70	110	210	0	1	0	10	allm trötth	110	1.3	4.46	6.80792	2.43	156.6	96.3	61.7	1.63	86	30	56
2	54	0	169	2.8561	79	27.6601	3	33.5	56	122	65	157	166	0.945783	92	9	145	40	15	105	0	0	134.85	135	150.211	0.965306	0.898733	8	110	65	90	220	0	1	0	10	allm trötth	117	1.8	4.585	6.47649	1.51	175.3	93.9	67.1	1.87	79	24	55
2	58	1	187	3.4969	114	32.6003	4	42	60	135	94	152	162	0.938272	58	10	120	40	10	80	0	0	128.4	128	239.268	0.501529	0.534964	9	145	90	165	200	0	1	1	10	allmän trötthet	142	4.8	4.315	6.57315	2.56	177.1	74.2	58	2.39	108	42	66
2	43	1	182	3.3124	80	24.1517	3	50	57	113	86	154	177	0.870056	68	23	180	40	20	140	0	0	171	171	264.376	0.68085	0.646807	8	160	75	145	245	0	1	1	7	ben	117	0.76	4.62	5.85494	2.26	214.6	112.6	51.5	1.91	113	52	61
2	59	1	176	3.0976	73	23.5666	1	46	54	134	66	162	161	1.00621	96	-1	230	50	20	180	0	0	218.5	219	211.799	1.08594	1.034	10	135	85	115	210	0	1	0	7	ben	131	1.2	4.29	5.39898	2.75	210.2	111.7	63.5	1.88	83	18	65
2	40	1	179	3.2041	72	22.4712	3	43	59	133	59	179	180	0.994444	120	1	220	40	20	180	0	0	209	209	262.407	0.838393	0.796473	10	145	85	130	220	0	1	0	10	ben	110	0.63	4.805	7.17774	3.03	221	116.7	69.1	1.89	112	38	74
2	63	1	182	3.3124	90	27.1706	4	46	60	128	98	153	157	0.974522	55	4	130	40	15	90	130	0		130	214.664	0.605599	0.605599	7	125	80	125	240	0	1	0	7	ben	136	7.6	3.995	9.55044		212.8	102.1	59.4	2.09	85	25	60
2	49	0	165	2.7225	56	20.5693	1	30.5	51	127	51	139	171	0.812865	88	32	145	40	15	105	0	0	134.85	135	151.848	0.954903	0.889047	7	130	85	125	165	0	1	0	5	ben	111	3.7	4.015	5.75238	3.04	133.7	82.4	75.5	1.62	64	18	46
2	31	1	180	3.24	63	19.4444	3	46	56	146	91	184	189	0.973545	93	5	210	50	20	160	0	0	199.5	200	278.076	0.755189	0.719227	9	130	85	135	180	0	1	0	10	ben	184	1.2	4.135	3.77513	2.41	156.7	86.9	58.4	1.8	92	41	51
2	44	1	187	3.4969	85	24.3072	3	49	69	145	62	137	176	0.778409	75	39	210	50	20	160	0	0	199.5	200	275.285	0.762847	0.726521	9	150	95		230	1	1	0	9.5	allm trötth	106	0.53	5.6	5.50683	1.87	258.1	122.6	53.6	2.11	135	62	73
2	30	0	167	2.7889	65	23.3067	4	32	60	119	86	187	190	0.984211	101	3	185	40	15	145	0	0	172.05	172	178.862	1.03432	0.961635	10	120	70		150	0	1	0	10	allm trötth	93		4.145	4.92696	1.44	116.6	67.4	58.7	1.73	68	24	44
2	58	1	182	3.3124	102	30.7934	2	49	60	140	68	160	162	0.987654	92	2	250	50	20	200	0	0	237.5	238	227.904	1.09695	1.0443	11	135	80	125	180	0	1	0	7	ben	122	4.5	5.68	4.20373	3.24	379.5	170.1	73	2.23	124	38	86
2	52	1	176	3.0976	76	24.5351	1	47	52	148	82	181	168	1.07738	99	-13	260	60	20	200	0	0	247	247	228.732	1.1367	1.07986	11	120	90	130	180	0	0	0	10	ben	152	0.25	4.715	5.42531	2.04	183.1	95.3	60.4	1.92	110	41	69
2	55	1	183	3.3489	86	25.6801	2	58.5	68	138	50	172	165	1.04242	122	-7	270	50	20	220	0	0	256.5	257	238.036	1.13428	1.07967	11	140	85	135	200	0	1	1	9.5	ben	123.7		5.785	5.01052	1.81	312.3	149.1	59.4	2.09	150	75	75
2	51	1	186	3.4596	91	26.3036	3	49	65	143	68	113	169	0.668639	45	56	130	40	15	90	130	0		130	255.581	0.508644	0.508644	7	95	75	80	100	1	1	1	9	allm trötth	81		4.76		1.31	244.5	113.2	45.4	2.16	85	26	59
2	55	0	160	2.56	57.3	22.3828	2	26	52	129	69	169	165	1.02424	100	-4	130	40	15	90	0	0	120.9	121	135.554	0.959027	0.892633	7	110	80	100	190	0	0	0	10	ben	119	1.2	4.09	6.06866	2.33	129.3	81.5	53.6	1.59	71	28	43
2	57	1	178	3.1684	87	27.4587	3	58	68	159	64	167	163	1.02454	103	-4	260	40	20	220	0	0	247	247	221.318	1.17478	1.11604	12	140	70	120	185	0	0	0	10	?	110	3	3.99	4.36752	2.41	143.4	69.9	61.5	2.05	104	38	66
2	54	1	179	3.2041	90	28.089	2	50	55	178	44	159	166	0.957831	115	7	240	60	20	180	0	0	228	228	231.115	1.03845	0.986523	9	150	100	135	190	1	1	0	7	andn	116	4.9	5.18	3.78449	2.7	166.6	79.7	65.4	2.09	96	44	52
2	25	0	154	2.3716	40	16.8663	2	29.5	67	152	77	184	195	0.94359	107	11	145	40	15	105	0	0	134.85	135	157.962	0.917945	0.854638	8	130	80	110	180	0	1	0	10	allt	104	16.6	3.785	5.1408	1.64	86.2	64.5	64.8	1.34	59	16	43
2	54	1	184	3.3856	84	24.811	4	47	58	136	68	113	166	0.680723	45	53	170	50	15	120	170	0		170	242.995	0.699603	0.699603	9	160	70	140	180	1	1	0	9	?	167	1.5	4.11	6.68463	2.66	136.9	66.1	53.4	2.07	78	22	56
2	55	0	165	2.7225	65	23.8751	2	31	63	135	66	154	165	0.933333	88	11	160	40	15	120	0	0	148.8	149	142.816	1.12032	1.0433	9	140	85	140	205	0	0	0	9	allm trötth	107	2.3	4.59	5.85925	2.34	143.6	83.7	70.3	1.72	87	33	54
2	50	0	168	2.8224	83	29.4076	1	35	60	135	65	169	170	0.994118	104	1	190	40	15	150	0	0	176.7	177	154.952	1.22618	1.14229	10	120	90	140	230	0	0	1	9	ben	106	4.1	5	7.44946	1.85	202	104.3	80.5	1.94	85	24	61
2	39	0	164	2.6896	57	21.1927	3	30	56	106	60	152	181	0.839779	92	29	140	40	20	100	0	0	130.2	130	164.075	0.853269	0.792321	5	110	80	105	140	0	1	0	9	ben	113	2.4	4.185	5.07934	2.5	106.8	67	65.8	2.07	96	31	65
2	44	1	180	3.24	71	21.9136	3	57	60	137	65	189	176	1.07386	124	-13	220	60	20	160	0	0	209	209	256.979	0.8561	0.813295	10	120	80	90	180	0	0	0	10	allm trötth	117	1.1	5.37	4.31871	2.42	193.2	101.8	49.6	1.9	103	45	58
2	38	1	175	3.0625	70	22.8571	2	42	68	147	66	177	182	0.972527	111	5	270	50	20	220	0	0	256.5	257	255.066	1.05855	1.00758	12	125	80	125	220	0	0	0	9.5	ben	107	0.38	4.155	4.69298	2.34	116.4	63	78.3	1.85	105	34	71
2	46	0	170	2.89	72	24.9135	1	27	57	138	60	157	174	0.902299	97	17	215	50	15	165	0	0	199.95	200	164.165	1.30966	1.21828	12	110	80	110	195	0	0	0	10	allm trötth	118	4	4.85	4.53971	2.64	131.4	71.8	67	1.83	87	25	62
2	39	1	185	3.4225	98	28.634	1	48	64	145	69	196	181	1.08287	127	-15	300	60	20	240	0	0	285	285	280.546	1.06934	1.01587	13	110	60	115	175	0	0	0	10	allt	125	3.5	4.65	3.66096	2.05	178.5	79.8	61.9	2.24	131	55	76
2	50	1	172	2.9584	73	24.6755	3	35	59	151	57	159	170	0.935294	102	11	210	50	20	160	0	0	199.5	200	223.477	0.939692	0.894945	8	110	75	95	190	1	1	0	8.5	ben	110	1.3	4.86	3.26458	2.27	228.7	123.1	73.8	1.86	118	46	72
2	24	1	180	3.24	62	19.1358	2	41	65	121	77	166	196	0.846939	89	30	180	60	15	120	180	0		180	278.274	0.646845	0.646845	8	130	70	125	160	1	0	0	10	allt	84	5.7	5.54	4.35228	1.6	182.3	101.3	50	1.8	125	47	78
2	36	1	194	3.7636	90	23.9133	2	50	56	133	58	165	184	0.896739	107	19	320	80	20	240	0	0	304	304	310.764	1.02972	0.978233	13	140	75	140	240	0	1	0	9.5	allm trötth	130	0.53	5.685	3.73579	2.94	230.3	103	65.4	2.23	162	79	83
2	36	0	164	2.6896	57	21.1927	2	35	65	121	85	197	184	1.07065	112	-13	175	40	15	135	0	0	162.75	163	167.679	1.04366	0.972095	10	115	65	120	185	0	1	0	9	allt	102	0.33	4.13	4.68004	2.63	98.1	60.3	58.5	1.63
2	54	1	181	3.2761	106	32.3555	3	41	55	142	64	126	166	0.759036	62	40	170	50	20	120	0	0	161.5	162	235.867	0.720746	0.686829	7	130	70	120	235	1	1	1	10	ben	124	0.86	4.305	7.01471	2.2	166.7	73.8	72.7	2.26	100	33	67
2	39	1	187	3.4969	83	23.7353	3	57	58	137	64	187	181	1.03315	123	-6	310	70	20	240	0	0	294.5	295	285.98	1.08399	1.03154	12	140	85	125	200	0	1	0	10	ben	154	5.6	4.64	3.66671	2.79	224	107.5	67.2	2.08	105	34	71
2	55	1	178	3.1684	84	26.5118	1	50	61	148	70	181	165	1.09697	111	-16	260	60	20	200	0	0	247	247	226.283	1.149	1.09155	10	130	80	125	230	0	1	0	10	allm trötth	130	3.4	5.095	4.52138	2.14	181.6	89.8	59.9	2.02	93	20	73
2	59	0	168	2.8224	69	24.4473	3	31	62	125	68	155	161	0.962733	87	6	115	40	15	75	0	0	106.95	107	140.842	0.816516	0.759715	6	220	80	185	270	0	1	1	9	blodtryck	129	1.6	4.69	6.4672	1.94	273.7	153.5	58.5	1.78	100	35	65
2	50	0	160	2.56	67	26.1719	3	26	67	134	85	181	170	1.06471	96	-11	185	50	15	135	0	0	172.05	172	142.719	1.29625	1.20516	10	140	85	155	220	0	1	0	9.5	ben	94	2.4	3.52	7.41324	1.97	95.4	55.5	75	1.72	86	28	58
3	50	0	175	3.0625	82	26.7755	2	28.5	93	131	70	174	170	1.02353	104	-4	215	50	15	165	0	0	199.95	200	165.656	1.29787	1.20732	12	125	75	120	205	0			10	allt	77.8		4.93	5.38852	3	132.5	67	71	1.98	107	33	74
3	31	0	170	2.89	63	21.7993	1	27	129	120	77	174	189	0.920635	97	15	215	50	15	165	0	0	199.95	200	183.354	1.17259	1.09078	12	160	70	100	140	0			7	ben	63.7	0.2	4.835	3.50465	2.19	167	96.5	54.9	1.73	119	41	78
3	33	1	190	3.61	81	22.4377	1	57.5	109	143	63	168	187	0.898396	105	19	310	70	20	240	0	0	294.5	295	304.168	1.01917	0.969858	13	130	70	130	220	0			9	allm trötth	76.6	1.6	5.195	3.63224	2.4	200.5	96	60.3	2.09	156	53	103
3	60	1	187	3.4969	98	28.0248	1	57	94	141	54	147	160	0.91875	93	13	270	50	20	220	0	0	256.5	257	233.743	1.15511	1.0995	12	120	80	105	220	0			9	ben	95	2.1	5.015	6.256	2.33	228.8	102.3	70.9	2.24	118	37	81
3	62	1	174	3.0276	92	30.3871	3	43	100	161	59	175	158	1.10759	116	-17	250	50	20	200	0	0	237.5	238	199.992	1.25005	1.19004	11	130	90	120	180	0			7	ben	91	0.84	4.375	4.57654	2.07	157.1	76	62.7	2.07	115	40	75
3	64	1	181	3.2761	77	23.5036	1	51	84	151	54	161	156	1.03205	107	-5	270	50	20	220	0	0	256.5	257	209.873	1.28649	1.22455	12	110	70	110	170	0			8.5	andn	101	0.72	5	4.62651	1.99	218.7	110.9	49.6	1.97	118	49	69
3	26	0	168	2.8224	72	25.5102	2	33	83	145	52	176	194	0.907216	124	18	190	40	15	150	0	0	176.7	177	183.006	1.03822	0.967181	11	90	60	85	140	0			9	ben	82	0.66	4.915	4.19639	2.5	150.4	84.7	55	1.78	110	34	76
3	59	1	180	3.24	100	30.8642	3	58	109	146	73	158	161	0.981366	85	3	240	40	20	200	0	0	228	228	220.786	1.08703	1.03268	11	150	80	130	250	0			10	oklart	67	1.4	3.495	4.1837	1.3	93	42.4	83.9	2.2	118	44	74
3	45	1	177	3.1329	90	28.7274	2	53	103	166	62	167	175	0.954286	105	8	300	60	20	240	0	0	285	285	247.025	1.21445	1.15373	13	125	75	110	195	0			10	ben	96	0.75	4.91	6.78721	2.4	233.9	113.3	56.2	2.06	151	45	106
3	51	1	176	3.0976	76	24.5351	3	45	83	150	69	183	169	1.08284	114	-14	230	50	20	180	0	0	218.5	219	231.07	0.995371	0.947766	10	130	90	115	190	0			10	allm trött	64	1.7	4.86	5.19683	2.25	218.9	113.9	58.5	1.92	115	41	74
3	32	1	192	3.6864	86	23.329	2	65	100	164	77	181	188	0.962766	104	7	280	60	20	220	0	0	266	266	311	0.900322	0.855306	12	130	80	110	180	0			9	ben	91	3.2	4.845	4.37129	2.7	184.9	85.7	63.2	2.16	138	47	91
3	60	1	185	3.4225	90	26.2966	2	43	77	143	65	186	160	1.1625	121	-26	280	40	20	240	0	0	266	266	229.303	1.22109	1.16004	12	140	85	125	195	0			7	allm trötth	83	0.5	5.63	5.15583	2.38	252.4	117.9	61.2	2.14	163	70	93
3	39	0	165	2.7225	75	27.5482	2	35	107	143	92	187	181	1.03315	95	-6	200	40	20	160	0	0	178	178	165.761	1.20656	1.07384	9	115	95	105	165	0			10	allm trötth	81		4.52	6.53797	1.88	134.3	73.2	67.2	1.83	94	34	60
3	60	1	176	3.0976	84	27.1178	2	47	99	140	87	185	160	1.15625	98	-25	240	80	20	160	0	0	228	228	209.319	1.14658	1.08925	9	140	80	150	220	0			10	andn	71	6	5.115	7.74002	2.44	211.1	105.3	55.4	2.01	107	26	81
3	56	0	159	2.5281	54	21.3599	3	34	83	137	84	186	164	1.13415	102	-22	160	40	15	120	0	0	148.8	149	132.665	1.20604	1.12313	8	105	65	115	190	0			9	allm trötth	76	0.48	4.35	4.44338	2.36	132	85.5	58.8	1.54	72	22	50
3	53	1	173	2.9929	70	23.3887	3	48	87	156	83	177	167	1.05988	94	-10	220	60	20	160	0	0	209	209	219.167	1.0038	0.953612	9	155	105	160	230	0			10	allt	76	1.2	4.61	3.96464	2.15	157.7	86.1	70.7	1.83	80	25	55
3	51	1	155	2.4025	63	26.2227	3	25	93	133	74	179	169	1.05917	105	-10	145	40	15	105	145	0	137.75	138	179.595	0.807371	0.768395	8	140	90	150	230	0			10	ben	51	28.6	4.485	6.2857	2.83	158.1	97.7	51.1	1.62	98	49	49
3	53	1	181	3.2761	81	24.7245	2	48	103	159	82	187	167	1.11976	105	-20	260	40	20	220	0	0	247	247	238.377	1.09071	1.03617	12	130	80	120	200	0			9	ben	71	0.77	3.855	7.36727	2.62	133.8	66.4	63.7	2.02	89	26	63
3	55	1	178	3.1684	95	29.9836	3	47	92	148	82	172	165	1.04242	90	-7	240	40	20	200	0	0	228	228	226.283	1.06062	1.00759	11	140	80	140	225	0			10	ben	78	10.1	5.29		2.46	236.2	110.9	79.7	2.13
3	58	1	183	3.3489	72	21.4996	1	45	78	153	67	161	162	0.993827	94	1	260	60	20	200	0	0	247	247	230.177	1.12957	1.07309	11	130	60	130	190	0			10	ben+andn	76	2.2	4.66	4.47103	2.4	187.9	97.3	60.5	1.93	119	46	73
3	57	1	174	3.0276	69	22.7903	3	45	91	146	78	158	163	0.969325	80	5	160	60	20	100	0	0	152	152	212.123	0.754281	0.716567	6	125	85	125	240	0			8	ben	75	0.47	3.885	5.17013	1.71	200.7	111.8	59.7	1.8	92	29	63
3	48	0	158	2.4964	99	39.6571	3	33	105	135	73	183	172	1.06395	110	-11	185	50	15	135	0	0	172.05	172	142.405	1.29911	1.20782	10	130	80	140	210	0			10	ben	58	6.6	4.68	6.92378	2.46	165.6	83.3	71.6	1.99	100	43	57
3	39	1	193	3.7249	83	22.2825	2	50	101	146	75	193	181	1.0663	118	-12	310	90	20	220	0	0	294.5	295	302.28	1.02554	0.975918	12	125	80	105	195	0			9	ben	75	0.25	5.39	3.58012	2.19	219.8	101.8	58.6	2.16	111	51	60
3	29	0	167	2.7889	58	20.7967	3	33	104	144	74	179	191	0.937173	105	12	180	60	20	120	0	0	160.2	160	179.605	1.0022	0.890842	7	110	75	115	165	0			10	ben	54	0.2	4.645	3.65324	1.51	118.4	71.8	72.6	1.65	96	36	60
3	37	0	169	2.8561	58	20.3074	2	44	109	128	64	185	183	1.01093	121	-2	210	70	20	140	0	0	186.9	187	175.071	1.19951	1.06814	8	115	65	120	170	0			7	ben	75	0.2	4.765	4.3881	2.6	129.3	77.7	65.7	1.66	100	27	73
3	27	0	160	2.56	60	23.4375	2	29	118	115	63	175	193	0.906736	112	18	145	40	15	105	0	0	129.05	129	168.174	0.862203	0.767063	8	120	80	110	180	0			7	ben	47	0.27	4.37	3.65424	2.49	139.8	86.2	64.1	1.62	94	44	50
3	36	1	195	3.8025	90	23.6686	1	56	103	137	62	173	184	0.940217	111	11	380	120	20	260	0	0	361	361	313.533	1.212	1.1514	14	125	70	120	220	0			10	ben	84	0.36	5.37	4.33432	2.87	252.5	113.5	67.8	2.22	168	68	100
3	54	0	166	2.7556	62	22.4996	3	30	100	130	79	190	166	1.14458	111	-24	160	40	20	120	0	0	142.4	142	145.808	1.09733	0.973884	7	120	80	115	185	0			7	andn	78	0.58	4.52	6.67157	2.58	131.3	77.7	70.7	1.69	73	24	49
3	39	0	167	2.7889	69	24.7409	3	31	91	124	57	187	181	1.03315	130	-6	145	40	15	105	0	0	134.85	135	169.132	0.857318	0.798193	8	145	85	125	200	0			7	andn	68	2.4	4.32	5.2841	1.97	127.4	71.8	74.8	1.78	86	34	52
3	48	1	176	3.0976	62	20.0155	3	31	91	131	76	174	172	1.01163	98	-2	180	40	20	140	0	0	171	171	237.91	0.756588	0.718758	8	115	80	110	170	0			8.5	allm trötth	53	0.45	4.045	4.07255	3.08	125.1	71	71.8	1.76	92	34	58
3	55	0	167	2.7889	67	24.0238	2	26	89	133	60	183	165	1.10909	123	-18	230	50	20	180	0	0	204.7	205	145.721	1.57836	1.4068	10	115	80	110	190	0			10	allm	68	2.1	4.55	5.97137	3.15	139.8	78.9	71	1.77	100	30	70
3	36	1	180	3.24	83	25.6173	3	48	89	153	64	185	184	1.00543	121	-1	230	70	20	160	0	0	218.5	219	272.012	0.845551	0.805111	9	120	80	125	180	0			7	ben	83	1.7	5.925	3.11068	2.86	177.9	88.2	51.5	2.02	122	46	76
3	24	1	193	3.7249	86	23.0879	1	61	103	151	69	189	196	0.964286	120	7	410	90	20	320	0	0	389.5	390	315.087	1.30123	1.23775	17	130	70	120	180	0			9	ben	88	4.4	5.27	3.40575	2.63	252.4	117.9	65.8	2.14	177	78	99
3	39	1	174	3.0276	68	22.46	2	54	121	160	67	178	181	0.983425	111	3	260	60	20	200	0	0	247	147	250.663	1.03725	0.586444	11	120	70	120	210	0			9	ben	72	0.31	4.205	4.96072	3.56	165.2	90.9	83.2	1.82
3	44	1	175	3.0625	70	22.8571	1	57	110	133	77	188	176	1.06818	111	-12	360	80	20	280	0	0	342	342	243.904	1.47599	1.40219	15	130	85	120	175	0			9.5	ben	85	0.89	5.265	5.00558	2.1	181.6	98.2	83.6	1.85	141	48	93
3	40	1	177	3.1329	95	30.3233	2	50	124	146	75	192	180	1.06667	117	-12	230	50	20	180	0	0	218.5	219	257.011	0.894902	0.852103	10	130	75	130	215	0			7	ben	65	2	5.59	4.29879	1.99	251.7	118.6	80.4	2.12	119	48	71
3	51	1	180	3.24	85	26.2346	3	50	111	154	74	173	169	1.02367	99	-4	270	50	20	220	0	0	256.5	257	240.874	1.12092	1.06695	12	130	90	115	225	0			10	allt (ben mest)	77	1.2	5.12	6.13338	2.82	223.4	109.1	69.5	2.05	110	45	65
3	51	0	161	2.5921	65	25.0762	1	32	87	124	68	166	169	0.982249	98	3	210	50	20	160	0	0	186.9	187	142.816	1.47043	1.30938	9	130	80	120	205	0			7.5	allm trötth	79	1.1	4.13	4.90679	2.75	109.8	65.2	69.7	1.59	95	38	57
3	37	0	170	2.89	69	23.8754	2	40	117	134	79	185	183	1.01093	106	-2	260	40	20	220	0	0	231.4	231	176.782	1.47074	1.3067	12	110	70	110	150	0			10	ben	66	3.1	4.465	4.19325	2.05	129.9	72.7	62.6	1.79	91	34	57
3	59	0	170	2.89	68	23.5294	3	28	105	131	86	179	161	1.1118	93	-18	140	40	20	100	0	0	124.6	125	143.622	0.974781	0.87034	6	110	75	105	170	0			7	ben	55	0.91	4.025	6.94528	2.42	137.8	76.3	68.2	1.81	71	19	52
3	40	1	170	2.89	84	29.0657	2	52	99	157	54	186	180	1.03333	132	-6	240	60	20	180	0	0	228	228	238.127	1.00787	0.957472	10	120	80	110	225	0			9	ben	77	0.61	4.975	4.73955	1.99	189.9	97.6	71	1.95	105	29	76
3	57	1	175	3.0625	70	22.8571	2	45	91	132	64	167	163	1.02454	103	-4	240	80	20	160	0	0	228	228	214.422	1.11929	1.06333	9	140	80	130	210	0			9	ben+andn	91	2	4.42	5.4293	2.91	167.4	90.6	75.4	1.85	129	47	82
3	46	1	188	3.5344	80	22.6347	1	63	96	148	64	185	174	1.06322	121	-11	340	80	20	260	0	0	323	323	273.143	1.24477	1.18253	14	150	85	150	210	0			7	ben	74	0.2	4.725	3.40695	2.33	245.9	108.1	74.1	2.27	128	45	83
3	44	1	181	3.2761	80	24.4193	3	55	107	138	56	170	176	0.965909	114	6	260	60	20	200	0	0	247	247	259.594	1.00156	0.951484	11	100	60	95	160	0			9.5	ben	68	0.31	4.905	4.14429	2.95	191.1	94.3	69.8	2.02	141	52	89
3	57	0	175	3.0625	68	22.2041	1	33	97	130	70	156	163	0.957055	86	7	200	50	15	150	0	0	186	186	153.964	1.299	1.20807	11	125	70	130	205	0			7	ben	73	0.2	4.19	4.9591	2.85	186.5	102.2	71.2	1.83	107	42	65
3	56	1	181	3.2761	74	22.5878	1	57	93	137	79	186	164	1.13415	107	-22	270	50	20	220	0	0	256.5	257	230.784	1.16993	1.1136	12	115	80	130	220	0			8	EKG	80	3.1	4.525	4.98127	2.07	175.8	91.2	68.6	1.93	100	39	61
3	51	0	167	2.7889	60	21.5139	2	32	97	120	72	175	169	1.0355	103	-6	145	40	15	105	0	0	134.85	135	151.899	0.95458	0.888747	7	115	80	115	175	0			10	ben	55	0.29	3.855	3.16847	2.06	92.7	55.4	68.4	1.67	85	37	48
3	60	0	164	2.6896	69	25.6544	2	28	99	144	85	179	160	1.11875	94	-19	200	50	15	150	0	0	186	186	133.754	1.49528	1.39061	11	130	75	155	200	0			7	ben	68	3	4.365	6.37867	2.55	132.9	75.8	72.4	1.75	85	34	51
3	57	1	178	3.1684	77	24.3025	1	46	80	143	50	162	163	0.993865	112	1	240	60	20	180	0	0	228	228	221.318	1.08441	1.03019	10	135	80	125	185	0			9	ben	81	3.8	5.315	5.53846	3.06	235.5	120.2	64.7	1.96	152	64	88
3	57	1	182	3.3124	77	23.246	2	45	83	141	65	179	163	1.09816	114	-16	230	50	20	180	0	0	218.5	219	230.514	0.997769	0.95005	10	130	80	150	215	0			7	ben	82	3.3	4.76	4.99124	2.93	213.9	108	58.4	1.98	133	53	80
3	52	1	182	3.3124	85	25.6612	3	59	112	152	82	187	168	1.1131	105	-19	290	70	20	220	0	0	275.5	276	243.291	1.19199	1.13445	12	120	80	110	220	0			9.5	ben	70	0.2	4.75	5.65141	2.5	202.7	98.6	68.7	2.06	120	38	82
3	59	0	167	2.7889	56	20.0796	1	31	114	151	50	155	161	0.962733	105	6	190	50	20	140	0	0	169.1	169	139.452	1.36247	1.21188	8	100	70	85	160	0			7	ben	66	0.63	4.855	8.31404	3.08	146.6	90.9	53.9	1.61	127	39	88
3	54	1	186	3.4596	97	28.0379	2	58	112	138	53	171	166	1.03012	118	-5	290	50	20	240	0	0	275.5	276	247.747	1.17055	1.11404	13	130	80	115	185	0			6	andn	67	16.4	4.715	3.99991	2.28	218.4	98.4	60.4	2.22	137	55	82
3	54	1	181	3.2761	89	27.1664	3	68	106	145	67	181	166	1.09036	114	-15	260	60	20	200	0	0	247	247	235.867	1.10232	1.0472	11	115	75	120	185	0			9	ben+allm trötth	80	0.53	4.8	5.3006	3.17	199.2	94.9	53.5	2.1	121	53	68
[truncated: 9 more columns]

## Sheet: Explanation
JustW1510a = exercise capacity adjusted for increment/min for all subjects
JustWmale15 = exercise capacity in men with 15W increment/min
JustWfemale10 = exercise capacity in women with 10W increment/min
JustW1510 = exercise capacity adjusted to 10W increment/min for women and 15W increment/min for men in individuals with other increments/min
allmän trötthet - general exertion
ben = legs
andn = dyspnéa
allt = everything
